# Supplementary material for: Prebiotic chemistry: chemical evolution of organics on the primitive Earth under simulated prebiotic conditions
Source: Royal Society of Chemistry journal article supplement (doi:10.1039/b709813h), 2007-10-11
Supplement: b709813h.pdf [file b709813h.pdf]

## Prebiotic Chemistry: Chemical Evolution of Organics on the Primitive Earth under Simulated Prebiotic Conditions

Daniele Dondi,<sup>†</sup> \* Daniele Merli,<sup>†</sup> Luca Pretali,<sup>‡</sup> Maurizio Fagnoni,<sup>‡</sup>  
Angelo Albini<sup>1‡</sup> and Nick Serpone<sup>2‡</sup>

<sup>†</sup>*Dipartimento di Chimica Generale, Università di Pavia, via Taramelli 12, Pavia 27100, Italia*

<sup>‡</sup>*Dipartimento di Chimica Organica, Università di Pavia, via Taramelli 10, Pavia 27100, Italia*

### Supplementary Material

Mass spectra were recorded on a DSQ Thermo Scientific Mass Spectrometer (transfer line temperature, 290°C; source temperature, 250°C; Scan segment,  $m/z = 35\text{--}600$  Daltons; full scan rate, 920 Daltons  $\text{min}^{-1}$ ; start time, 4 min) coupled to a Focus GC Thermo Scientific RTX-5 Gas Chromatograph. Suitable separation of analytes was achieved using a HP-5 column (15 m x 0.25 mm inner diameter); helium was the carrier gas (1 mL  $\text{min}^{-1}$ ). The oven temperature program was: 3 min at 50°C, from 50 to 300 C at 15°C  $\text{min}^{-1}$  and then the temperature was maintained at 300 °C for 10 min. Samples were analyzed by direct injection into the gas chromatograph/mass spectrometer following dilution of the resulting products with methanol.

Methanol solutions of pure HMT, 2,2,6,6-tetramethylpiperidin-4-one, mesityl oxide, 2,5-dimethylpyrrole and N-methylacetamide were used for comparison.

Mass spectral patterns of compounds cited in the article. Insets display the gas chromatograms of the mixtures analyzed.

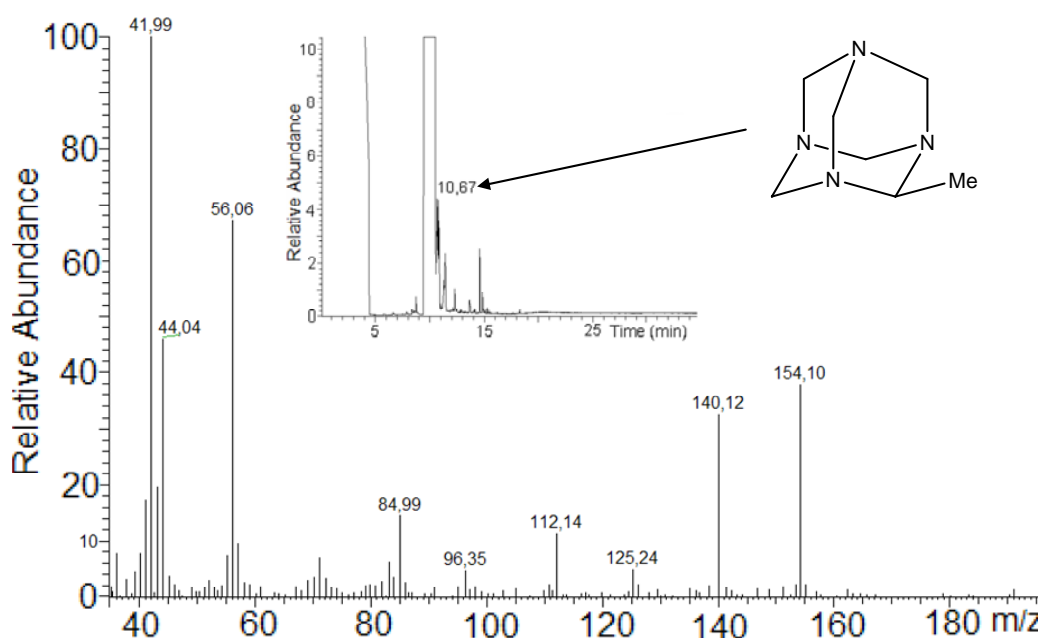

<sup>1</sup> Senior Professor, University of Pavia.

<sup>2</sup> Professor Emeritus, Concordia University, Montreal, Canada, and Visiting Professor, University of Pavia.

\* Corresponding authors: Tel.: (+39) 0382 98 73 16 ; Fax: (+39) 0382 98 73 23 ; e-mail: [daniele.dondi@unipv.it](mailto:daniele.dondi@unipv.it)

**Figure S1** – Mass spectrum and gas chromatogram of the product **methyl-HMT**.

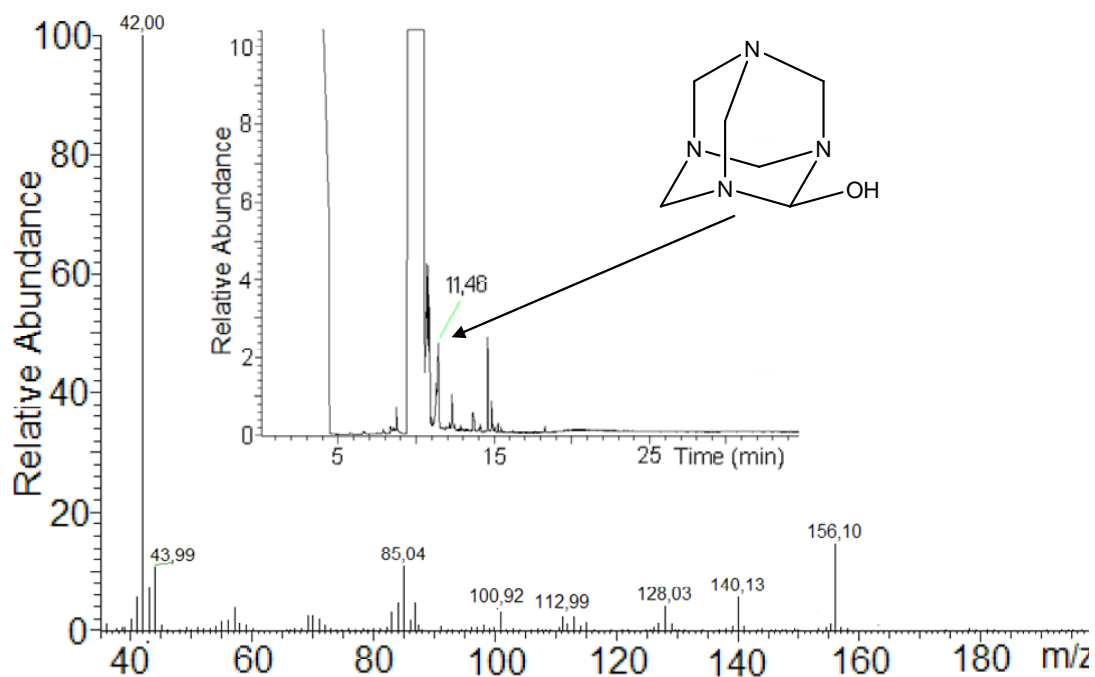

**Figure S2** – Mass spectrum and gas chromatogram of the product **hydroxy-HMT**.

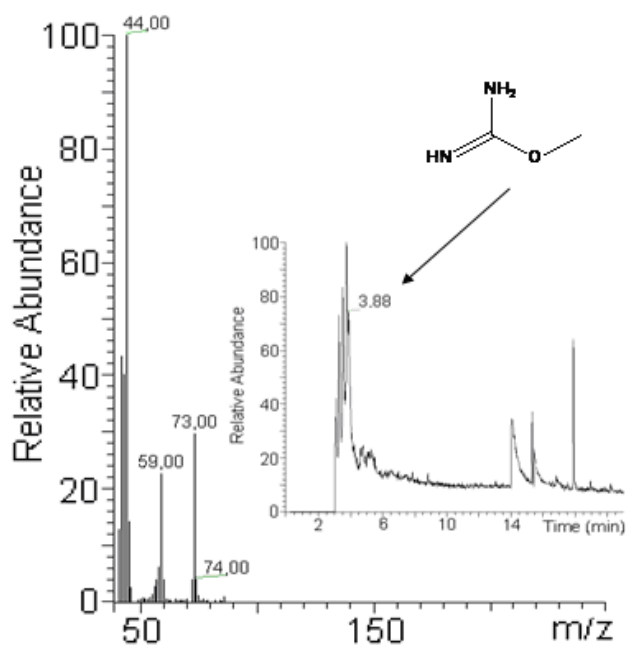

**Figure S3** – Mass spectrum and gas chromatogram of the product **O-methylisourea**.

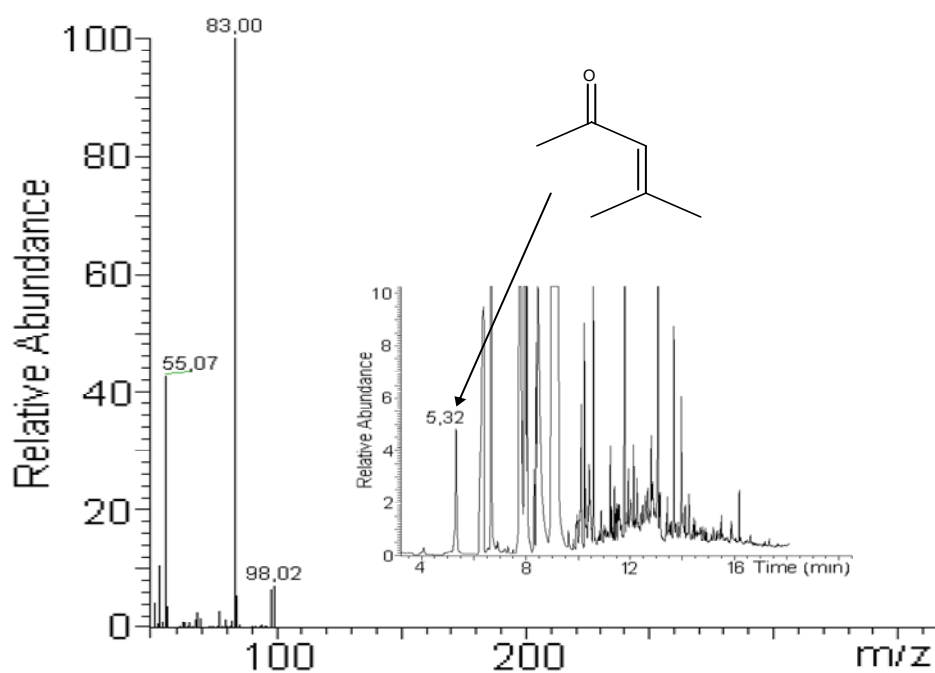

Figure S4 – Mass spectrum and gas chromatogram of the product **mesityl oxide**.

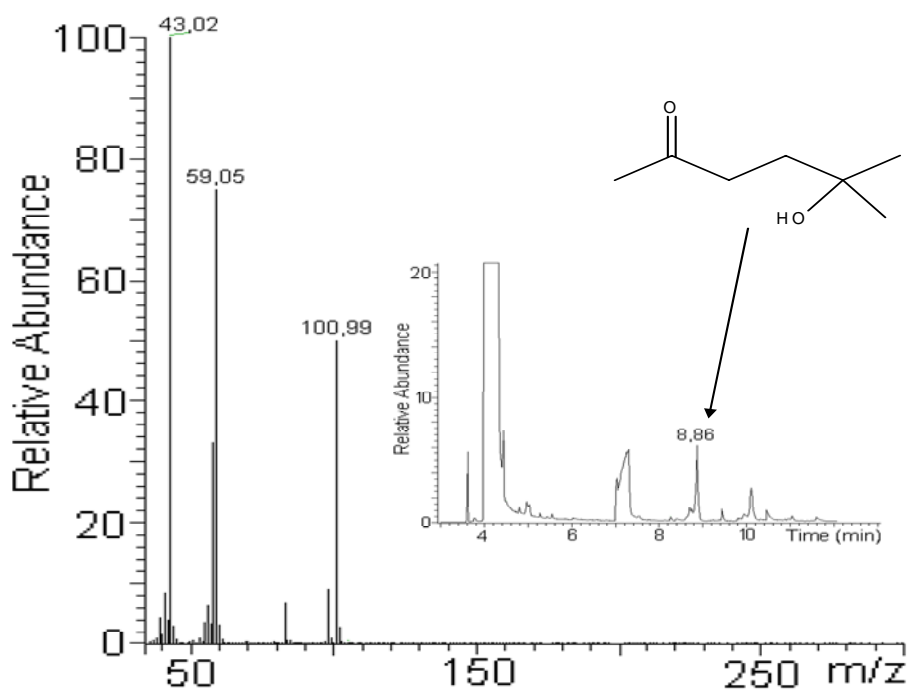

Figure S5 – Mass spectrum and gas chromatogram of the product **4-hydroxy-4-methylpentan-2-one**.

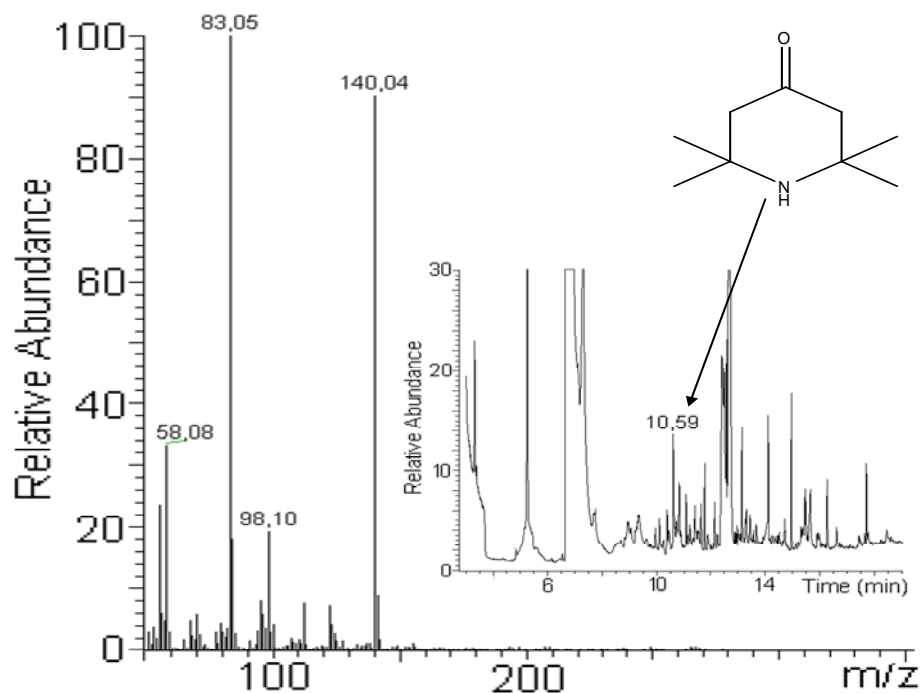

**Figure S6** – Mass spectrum and gas chromatogram of the product **2,2,6,6-tetramethylpiperidin-4-one**.

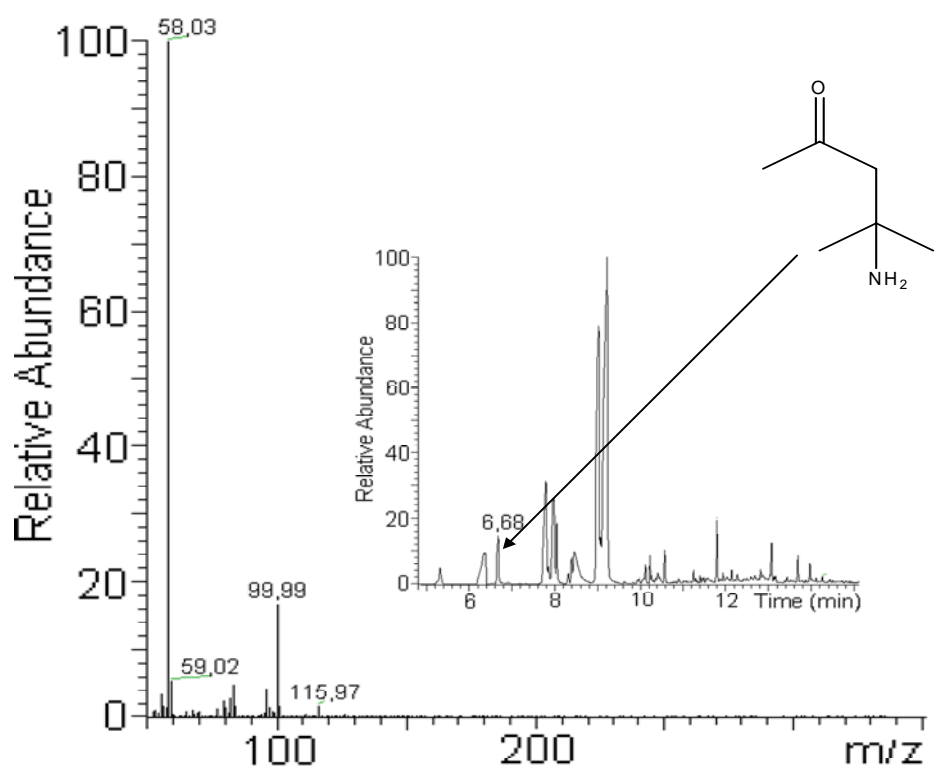

**Figure S7** – Mass spectrum and gas chromatogram of the product **diacetoneamine**.

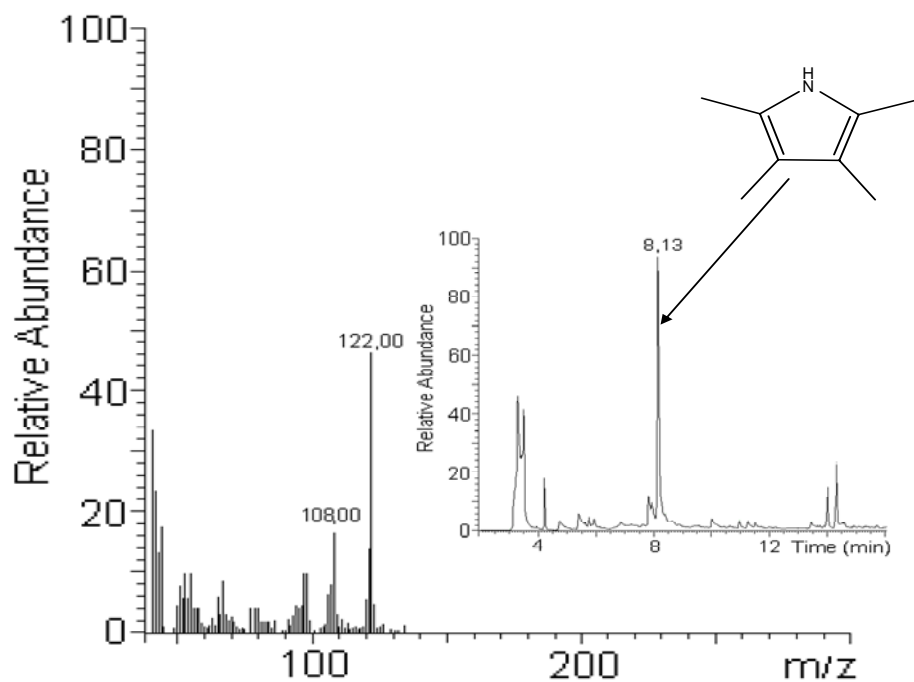

**Figure S8** – Mass spectrum and gas chromatogram of the product **2,3,4,5-tetramethylpyrrole**.

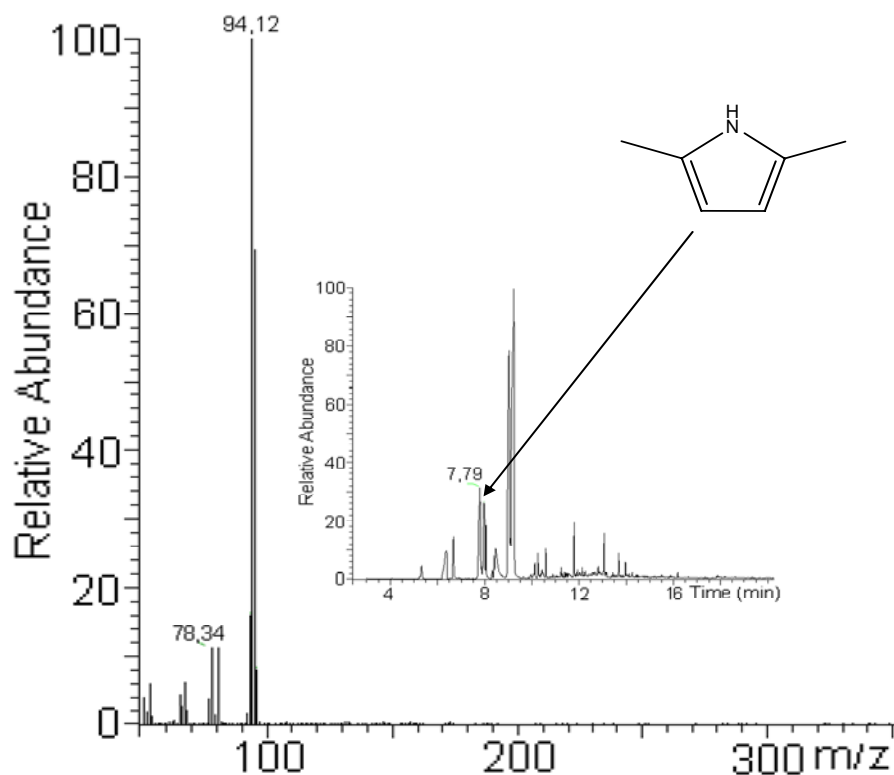

**Figure S9** – Mass spectrum and gas chromatogram of the product **2,5-dimethylpyrrole**.

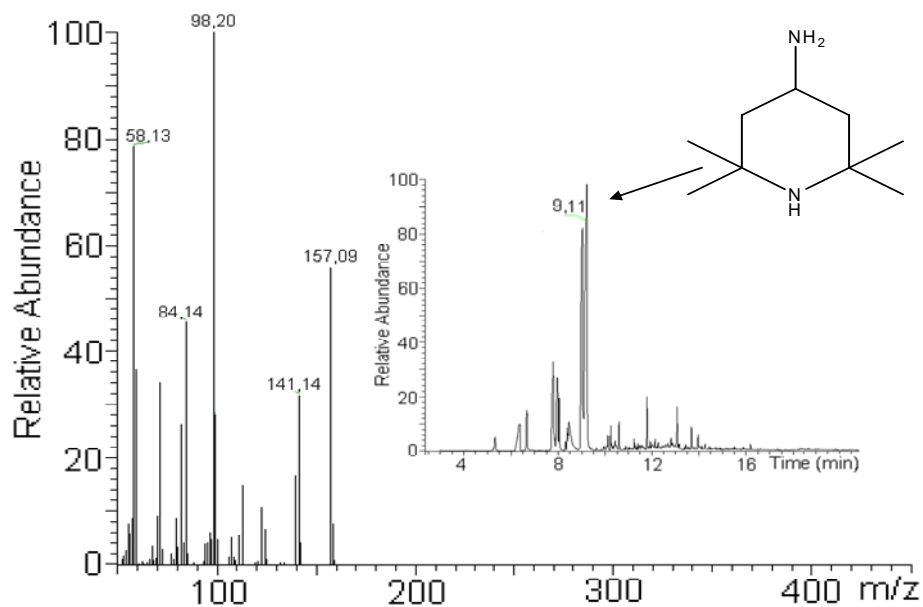

**Figure S10** – Mass spectrum and gas chromatogram of the product **4-amino-2,2,6,6-tetramethylpiperidine**.

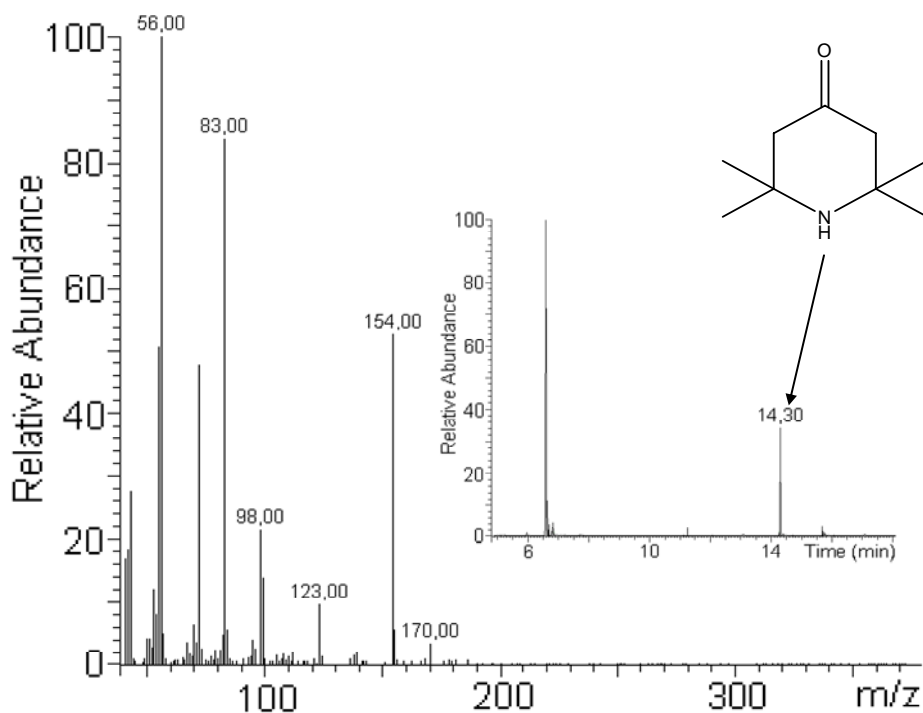

**Figure S11** – Mass spectrum and gas chromatogram of the product **N-methyl-2,2,6,6-tetramethylpiperidin-4-one**.

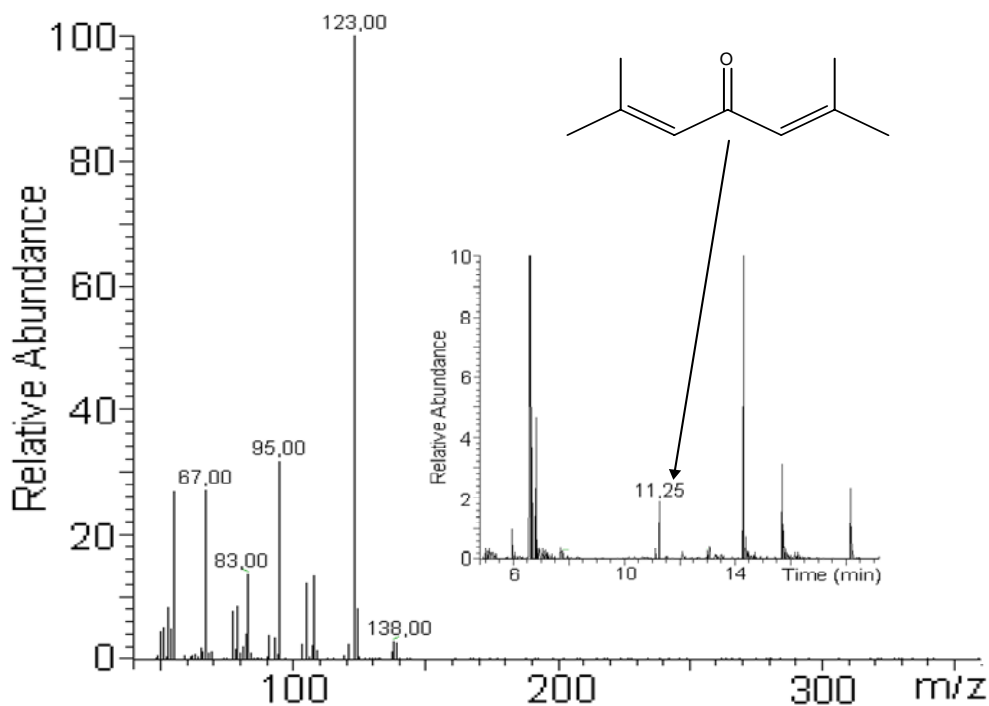

**Figure S12** – Mass spectrum and gas chromatogram of the product **2,6-dimethyl-2,5-heptadien-4-one**.

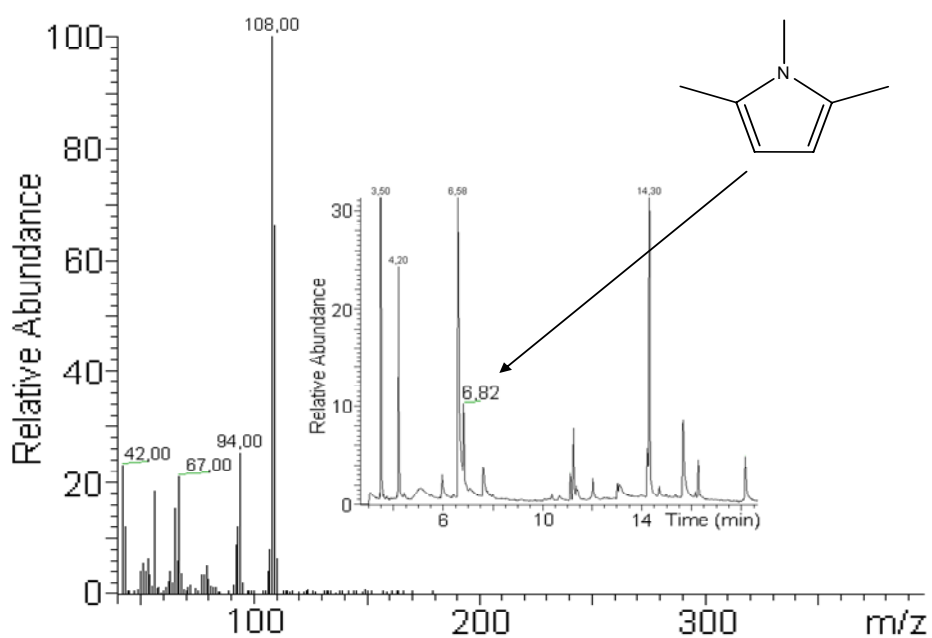

**Figure S13** – Mass spectrum and gas chromatogram of the product **1,2,5-trimethylpyrrole**.

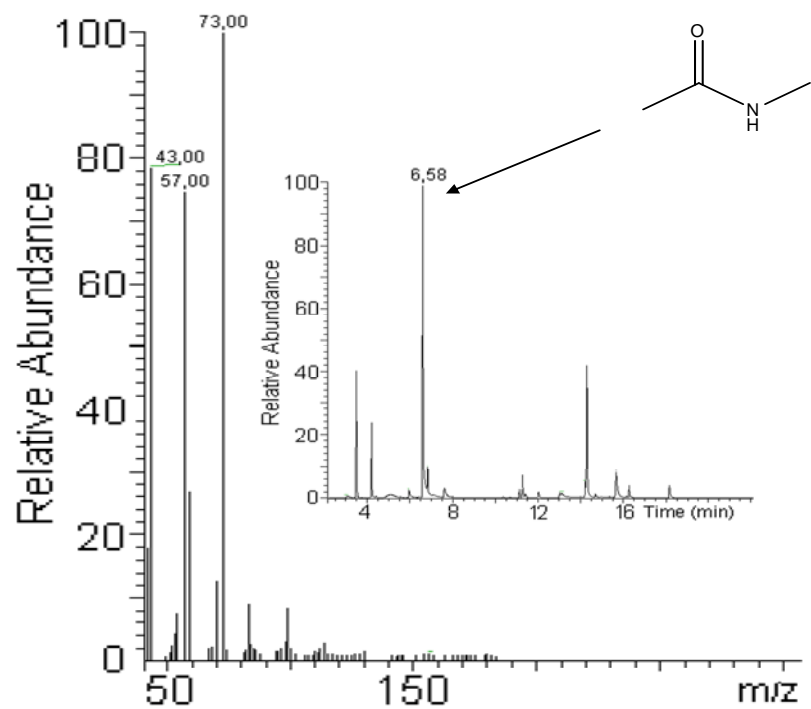

**Figure S14** – Mass spectrum and gas chromatogram of the product **N-methylacetamide**.

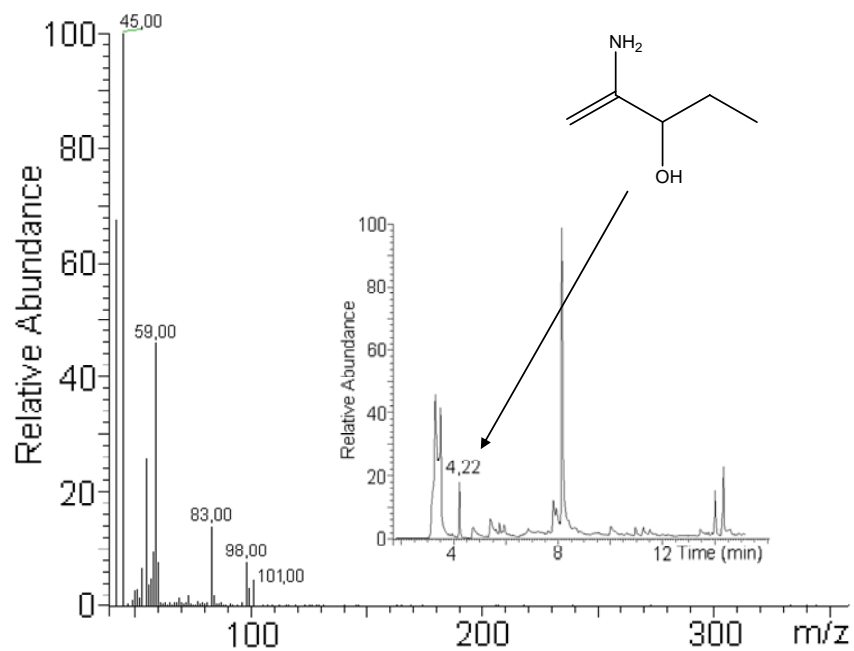

**Figure S15** – Mass spectrum and gas chromatogram of the product **2-amino-3-hydroxy-1-pentene**.



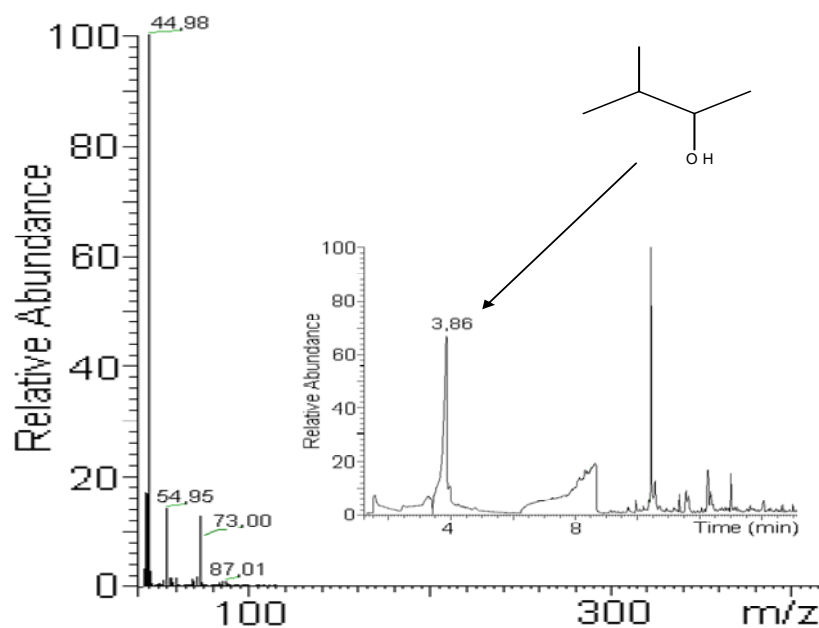

**Figure S16** – Mass spectrum and gas chromatogram of the product **3-methylbutan-2-ol**.

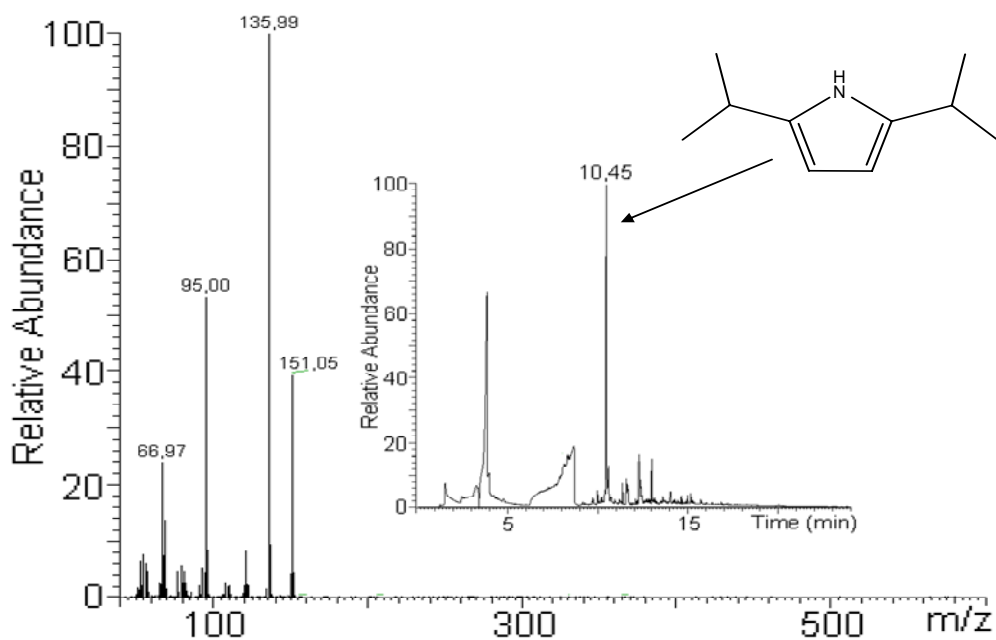

**Figure S17** – Mass spectrum and gas chromatogram of the product **2,5-diisopropylpyrrole**.

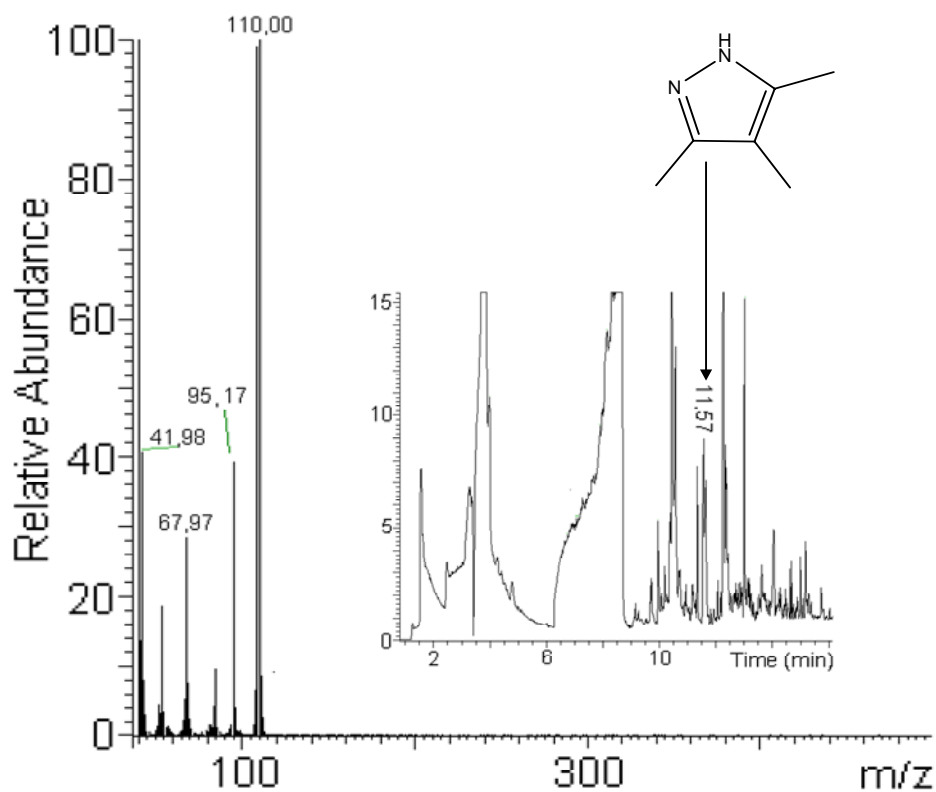

**Figure S18** – Mass spectrum and gas chromatogram of the product **2,3,4-trimethylpyrazole**.

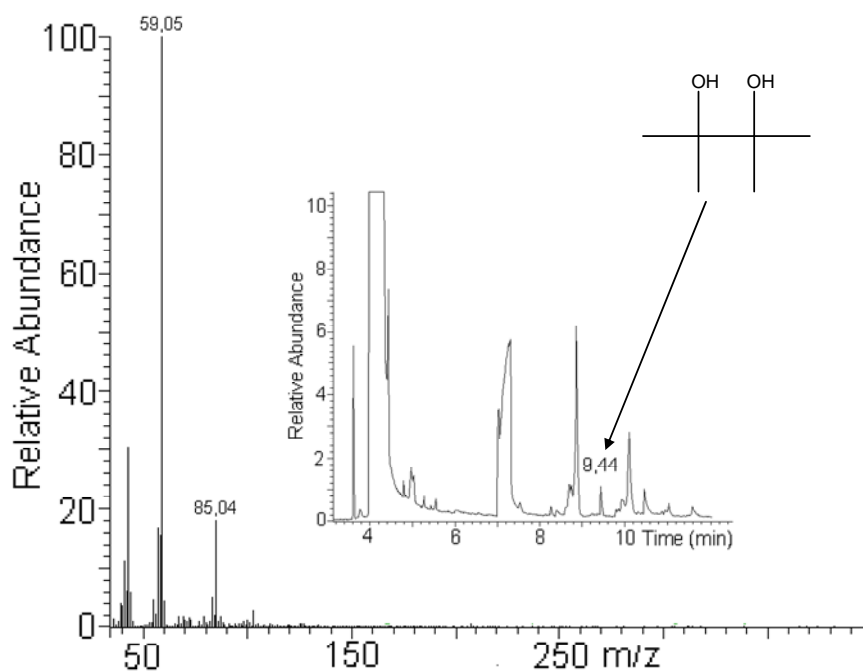

**Figure S19** – Mass spectrum and gas chromatogram of the product **2,3-dimethylbutane-2,3-diol**.

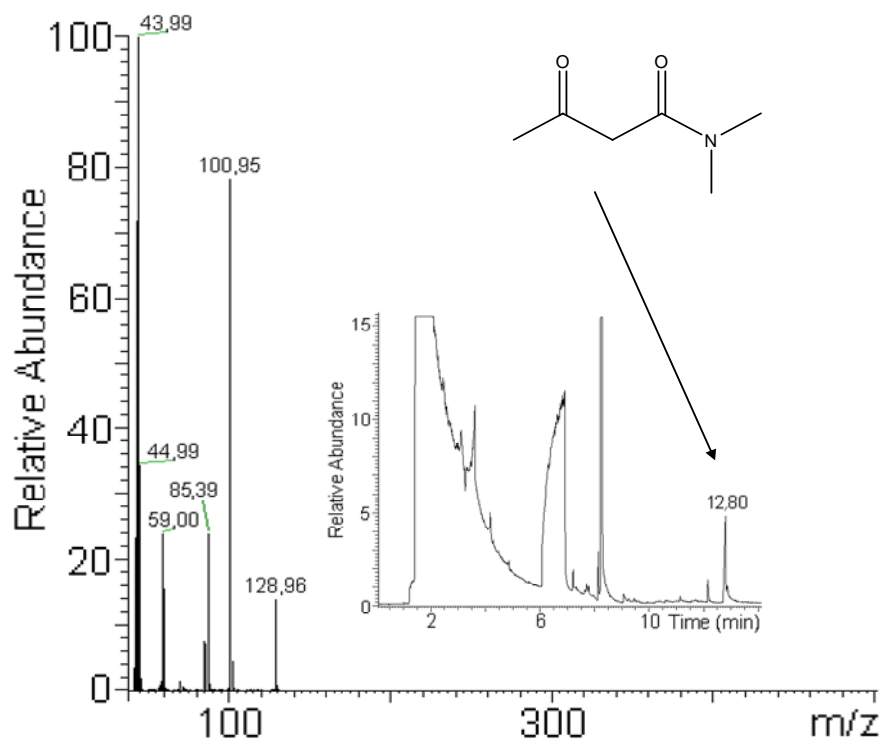

**Figure S20** – Mass spectrum and gas chromatogram of the product *N,N*-dimethylbutanamide-3-one.

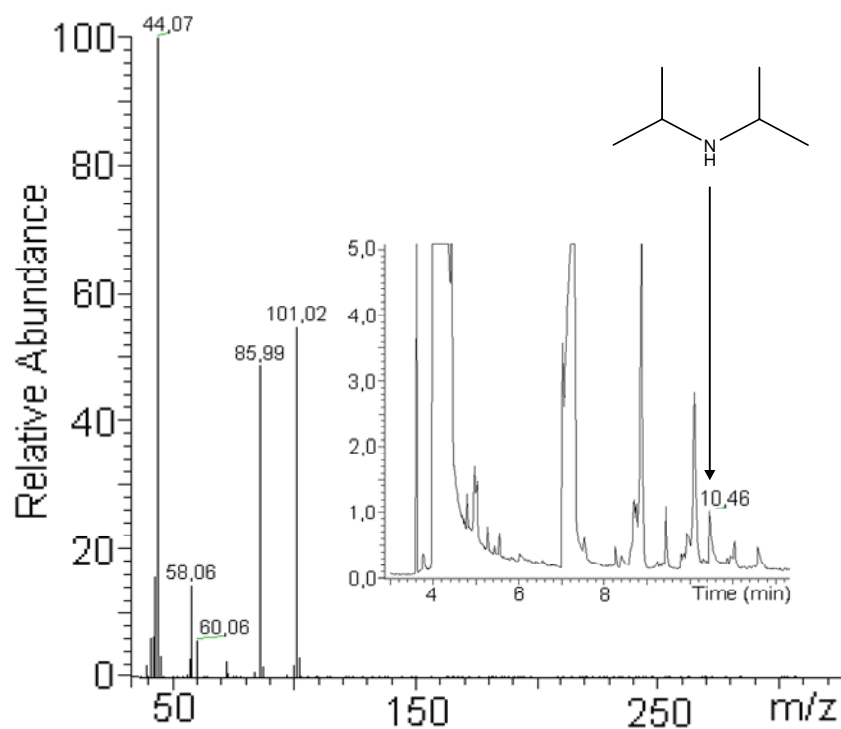

**Figure S21** – Mass spectrum and gas chromatogram of the product diisopropylamine.

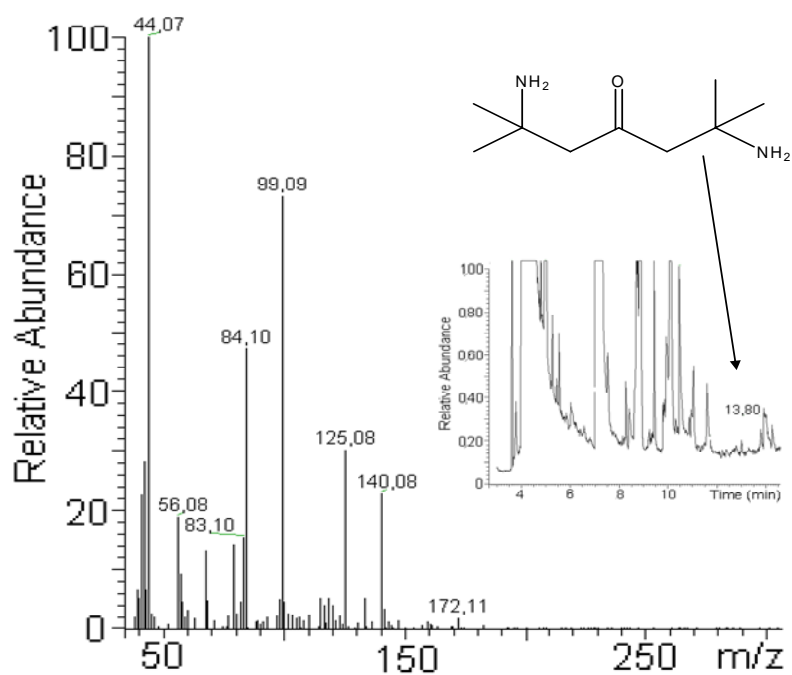

**Figure S22** – Mass spectrum and gas chromatogram of the product **2,6-diamino-2,6-dimethylheptan-4-one**.

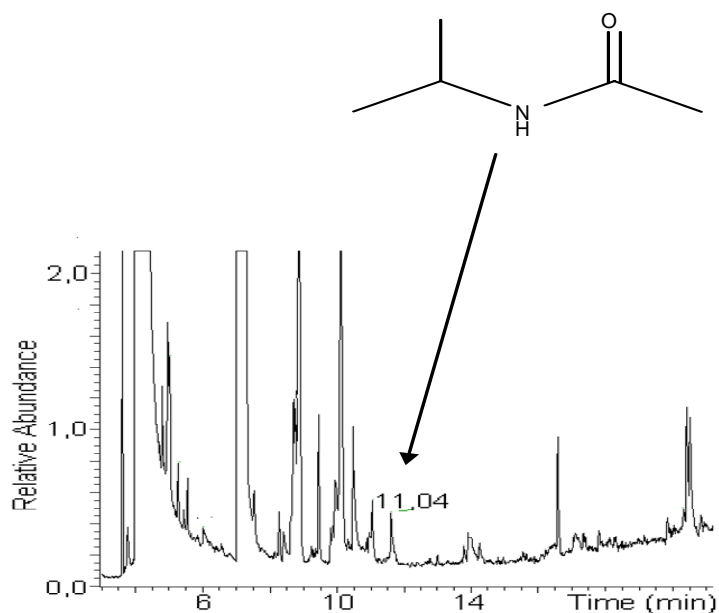

**Figure S23** – Gas chromatogram of the product **N-isopropylacetamide**.
